# Supplementary material
Source: HighWire-hosted journal article supplement (https://bmjopen.bmj.com/content/11/8/e047464)
Supplement: inline-supplementary-material-1 [file inline-supplementary-material-1.pdf]

| <b>Supplementary Material A: Information Sources &amp; Representative Search Strategy</b> |                                         |                                |                                  |
|-------------------------------------------------------------------------------------------|-----------------------------------------|--------------------------------|----------------------------------|
| <b>(i) Electronic Databases:</b>                                                          | <b>Database</b>                         | <b>Accessed From</b>           | <b>Planned Dates of Coverage</b> |
|                                                                                           | Pubmed                                  | NIH Website                    | From 2010 till 01.10.2020        |
|                                                                                           | Embase                                  | NHS HDAS Platform              | From 2010 till 01.10.2020        |
|                                                                                           | EMCARE                                  | NHS HDAS Platform              | From 2010 till 01.10.2020        |
|                                                                                           | HMIC                                    | NHS HDAS Platform              | From 2010 till 01.10.2020        |
|                                                                                           | BNI                                     | NHS HDAS Platform              | From 2010 till 01.10.2020        |
|                                                                                           | CINAHL                                  | NHS HDAS Platform              | From 2010 till 01.10.2020        |
|                                                                                           | AMED                                    | NHS HDAS Platform              | From 2010 till 01.10.2020        |
|                                                                                           | PsycINFO                                | NHS HDAS Platform              | From 2010 till 01.10.2020        |
|                                                                                           | Web of Science                          | Clarivate Analytics            | From 2010 till 01.10.2020        |
| <b>(ii) Trial Registers</b>                                                               | PROSPERO                                | CRD Database                   | From 2010 till 01.10.2020        |
|                                                                                           | Cochrane Database of Systematic Reviews | Cochrane Library               | From 2010 till 01.10.2020        |
|                                                                                           | Campbell Collaboration                  | Cambell Collaboration Website. | From 2010 till 01.10.2020        |

|                                         |                        |                                                      |                                                                                                 |
|-----------------------------------------|------------------------|------------------------------------------------------|-------------------------------------------------------------------------------------------------|
|                                         | JBI Evidence Synthesis | Joanna Briggs Institute Website.                     | From 2010 till 01.10.2020                                                                       |
|                                         | CRD/DARE Database      | Centre for Reviews and Dissemination Website.        | From 2010 till 01.10.2020.                                                                      |
| <b>(iii) Contact with study authors</b> | Researchgate           | Researchgate Website                                 | As per necessity to request for full text articles based on articles published till 01.10.2020. |
| <b>(iv) Grey Literature Sources</b>     | OpenGrey               | INIST-CNRS managed Website                           | 01.01.2010 to 01.10.2020                                                                        |
|                                         | TRIP Medical           | TRIP Database Website                                | 01.01.2010 to 01.10.2020                                                                        |
|                                         | WHO Database           | World Health Organization Website                    | From 2010 till 01.10.2020.                                                                      |
|                                         | MoHFW                  | Ministry of Health & Family Welfare Website.         | From 2010 till 01.10.2020.                                                                      |
|                                         | OGD Platform India     | Government of India Website on Open Government Data. | From 2010 till 01.10.2020.                                                                      |
|                                         | Google Scholar         | Google Scholar Website                               | From 2010 till 01.10.2020.                                                                      |

| Table 1                                                                                                                                                         |                                                                                                                                                                                                                                                                                                                                                                                                                                                              |         |
|-----------------------------------------------------------------------------------------------------------------------------------------------------------------|--------------------------------------------------------------------------------------------------------------------------------------------------------------------------------------------------------------------------------------------------------------------------------------------------------------------------------------------------------------------------------------------------------------------------------------------------------------|---------|
| A representative search for CINAHL database performed on NHS Openathens HDAS Platform on 14th May 2021. Time frame: 2010-2020. Peer Reviewed. English Language. |                                                                                                                                                                                                                                                                                                                                                                                                                                                              |         |
| Sl. No.                                                                                                                                                         | Search Terms                                                                                                                                                                                                                                                                                                                                                                                                                                                 | Results |
| 1                                                                                                                                                               | (India*).ti,ab OR (South Asia*).ti,ab OR (Asia*).ti,ab OR (LMIC).ti,ab OR (LIC).ti,ab OR (Low Income Countr*).ti,ab OR (Low Middle Income Countr*).ti,ab OR (SAARC).ti,ab OR (ASEAN).ti,ab                                                                                                                                                                                                                                                                   | 85642   |
| 2                                                                                                                                                               | (NCD*).ti,ab OR (non-communicable diseas*).ti,ab OR (chronic disease* OR myocardial ischemia).ti,ab OR (cardio?vascular diseas*).ti,ab OR (ischemic heart diseas* OR heart disease*).ti,ab OR (vascular disease*).ti,ab OR (Diabetes).ti,ab OR (Hypertension).ti,ab OR ("High Blood Pressure").ti,ab OR (Cancer).ti,ab OR (COPD).ti,ab OR (Chronic Obstructive Pulmonary Disease).ti,ab OR (Coronary Artery Diseas*).ti,ab OR (Coronary Heart Diseas*).ti,ab | 789662  |
| 3                                                                                                                                                               | (health system* OR program*).ti,ab OR (health?care system*).ti,ab OR (health planning* OR health service utiliz*).ti,ab OR (health?care planning*).ti,ab OR (health facilit*).ti,ab OR (National Health Policy).ti,ab OR (National Health Program*).ti,ab OR (NPCDCS).ti,ab OR "primary care" OR "primary healthcare" OR "secondary care" OR healthcare OR "tertiary care" OR hospital*                                                                      | 1503977 |
| 4                                                                                                                                                               | (prepare* OR health system prepared*).ti,ab OR (ready).ti,ab OR (readiness).ti,ab OR (facility? assess*).ti,ab OR (readiness).ti,ab                                                                                                                                                                                                                                                                                                                          | 77767   |
| 5                                                                                                                                                               | exp INDIA/ OR exp "ASIA, WESTERN"/                                                                                                                                                                                                                                                                                                                                                                                                                           | 128168  |
| 6                                                                                                                                                               | exp ASIANS/                                                                                                                                                                                                                                                                                                                                                                                                                                                  | 32187   |
| 7                                                                                                                                                               | exp "DEVELOPING COUNTRIES"/                                                                                                                                                                                                                                                                                                                                                                                                                                  | 18662   |
| 8                                                                                                                                                               | exp "LOW- AND MIDDLE INCOME COUNTRIES"/                                                                                                                                                                                                                                                                                                                                                                                                                      | 1361    |
| 9                                                                                                                                                               | (5 OR 6 OR 7 OR 8)                                                                                                                                                                                                                                                                                                                                                                                                                                           | 176910  |

|    |                                                                                                                                                                                                                                                        |         |
|----|--------------------------------------------------------------------------------------------------------------------------------------------------------------------------------------------------------------------------------------------------------|---------|
| 10 | (1 OR 9)                                                                                                                                                                                                                                               | 225727  |
| 11 | exp "CARDIOVASCULAR DISEASES"/ OR exp "HEART DISEASES"/<br>OR exp "VASCULAR DISEASES"/                                                                                                                                                                 | 584557  |
| 12 | exp "CORONARY DISEASE"/                                                                                                                                                                                                                                | 54503   |
| 13 | exp "MYOCARDIAL ISCHEMIA"/ OR exp "ACUTE CORONARY<br>SYNDROME"/                                                                                                                                                                                        | 101965  |
| 14 | exp "CHRONIC DISEASE"/ OR exp "NONCOMMUNICABLE<br>DISEASES"/                                                                                                                                                                                           | 64096   |
| 15 | exp "DIABETES MELLITUS"/                                                                                                                                                                                                                               | 164718  |
| 16 | exp HYPERTENSION/                                                                                                                                                                                                                                      | 78476   |
| 17 | exp "LUNG DISEASES, OBSTRUCTIVE"/                                                                                                                                                                                                                      | 60675   |
| 18 | exp NEOPLASMS/                                                                                                                                                                                                                                         | 544583  |
| 19 | (11 OR 12 OR 13 OR 14 OR 15 OR 16 OR 17 OR 18)                                                                                                                                                                                                         | 1311975 |
| 20 | (2 OR 19)                                                                                                                                                                                                                                              | 1554463 |
| 21 | (10 AND 20)                                                                                                                                                                                                                                            | 50731   |
| 22 | exp "HEALTH AND WELFARE PLANNING"/ OR exp "HEALTH<br>FACILITY PLANNING"/                                                                                                                                                                               | 171562  |
| 23 | exp "HEALTH CARE DELIVERY"/                                                                                                                                                                                                                            | 338701  |
| 24 | exp "NATIONAL HEALTH PROGRAMS"/ OR exp "HEALTH<br>RESOURCE UTILIZATION"/ OR exp "HEALTH SERVICES<br>ACCESSIBILITY"/ OR exp "MANAGED CARE PROGRAMS"/ OR exp<br>"PRIMARY HEALTH CARE"/ OR exp "SECONDARY HEALTH CARE"/<br>OR exp "TERTIARY HEALTH CARE"/ | 237596  |
| 25 | exp "PUBLIC HEALTH ADMINISTRATION"/ OR exp "PROGRAM<br>DEVELOPMENT"/                                                                                                                                                                                   | 88044   |
| 26 | exp "PUBLIC POLICY"/ OR exp "HEALTH POLICY"/                                                                                                                                                                                                           | 106774  |
| 27 | exp "HEALTH POLICY STUDIES"/ OR exp "POLICY STUDIES"/                                                                                                                                                                                                  | 827     |
| 28 | (22 OR 23 OR 24 OR 25 OR 26 OR 27)                                                                                                                                                                                                                     | 526561  |
| 29 | (3 OR 28)                                                                                                                                                                                                                                              | 1709631 |
| 30 | (21 AND 29)                                                                                                                                                                                                                                            | 20354   |

|    |                                                           |     |
|----|-----------------------------------------------------------|-----|
| 31 | (4 AND 30)                                                | 423 |
| 32 | (4 AND 30) [DT 2010-2020] [Peer reviewed] [Languages eng] | 326 |
