# Supplementary material
Source: HighWire-hosted journal article supplement (https://bmjopen.bmj.com/content/11/8/e047464)
Supplement: inline-supplementary-material-2 [file inline-supplementary-material-2.pdf]

**Supplementary Material B: Form for Screening of full text articles based on inclusion & exclusion criteria with documented justifications.**

| Basic Inclusion Criteria |       |                        |                           |                          |                                 |                        |                               | SB                    |                       | CTLP                  |                       | NY                    |                       | Final Decision (Yes/No) |
|--------------------------|-------|------------------------|---------------------------|--------------------------|---------------------------------|------------------------|-------------------------------|-----------------------|-----------------------|-----------------------|-----------------------|-----------------------|-----------------------|-------------------------|
| Sl. No.                  | Title | Is this peer reviewed? | Is this paper in English? | Is this a primary study? | Published between 2000 to 2020? | Does it concern India? | Article related to the topic? | Reasons for Inclusion | Reasons for Exclusion | Reasons for Inclusion | Reasons for Exclusion | Reasons for Inclusion | Reasons for Exclusion |                         |
| 1                        |       |                        |                           |                          |                                 |                        |                               |                       |                       |                       |                       |                       |                       |                         |
| 2                        |       |                        |                           |                          |                                 |                        |                               |                       |                       |                       |                       |                       |                       |                         |
| 3                        |       |                        |                           |                          |                                 |                        |                               |                       |                       |                       |                       |                       |                       |                         |
| 4                        |       |                        |                           |                          |                                 |                        |                               |                       |                       |                       |                       |                       |                       |                         |
| 5                        |       |                        |                           |                          |                                 |                        |                               |                       |                       |                       |                       |                       |                       |                         |
| 6                        |       |                        |                           |                          |                                 |                        |                               |                       |                       |                       |                       |                       |                       |                         |
| 7                        |       |                        |                           |                          |                                 |                        |                               |                       |                       |                       |                       |                       |                       |                         |
| 8                        |       |                        |                           |                          |                                 |                        |                               |                       |                       |                       |                       |                       |                       |                         |
| 9                        |       |                        |                           |                          |                                 |                        |                               |                       |                       |                       |                       |                       |                       |                         |
| 10                       |       |                        |                           |                          |                                 |                        |                               |                       |                       |                       |                       |                       |                       |                         |
