# Supplementary material
Source: HighWire-hosted journal article supplement (https://bmjopen.bmj.com/content/11/8/e047464)
Supplement: inline-supplementary-material-3 [file inline-supplementary-material-3.pdf]

| Supplementary Material C: Data Extraction Form for Included Studies |       |        |                |               |              |              |         |         |             |
|---------------------------------------------------------------------|-------|--------|----------------|---------------|--------------|--------------|---------|---------|-------------|
| Sl. No.                                                             | Title | Author | Year & Country | Research Aims | Study Design | Participants | Methods | Results | Conclusions |
| 1                                                                   |       |        |                |               |              |              |         |         |             |
| 2                                                                   |       |        |                |               |              |              |         |         |             |
| 3                                                                   |       |        |                |               |              |              |         |         |             |
| 4                                                                   |       |        |                |               |              |              |         |         |             |
| 5                                                                   |       |        |                |               |              |              |         |         |             |
| 6                                                                   |       |        |                |               |              |              |         |         |             |
| 7                                                                   |       |        |                |               |              |              |         |         |             |
| 8                                                                   |       |        |                |               |              |              |         |         |             |
| 9                                                                   |       |        |                |               |              |              |         |         |             |
| 10                                                                  |       |        |                |               |              |              |         |         |             |
| 11                                                                  |       |        |                |               |              |              |         |         |             |
